# Supplementary material for: Influence of the cystic fibrosis transmembrane conductance regulator on expression of lipid metabolism-related genes in dendritic cells
Source: PubMed Central journal article supplement (PMC2683168; doi:10.1186/1465-9921-10-26), 2009-04-03
Supplement: 1465-9921-10-26-S1.pdf [file 1465-9921-10-26-S1.pdf]

**Table 1. Up-regulated Genes in DC from CF Mice Compared to WT Mice**

| <b>Category / Probe Set ID</b>              | <b>Gene Symbol</b> | <b>Gene Title</b>                                           | <b>CF-Co / WT-Co <sup>(a)</sup></b> | <b>p value<sup>(b)</sup></b> |
|---------------------------------------------|--------------------|-------------------------------------------------------------|-------------------------------------|------------------------------|
| <b>signal transduction / growth control</b> |                    |                                                             |                                     |                              |
| 161181_f_at                                 | Dusp16             | dual specificity phosphatase 16                             | 4.42                                | 0.045                        |
| 99915_at                                    | Areg               | amphiregulin                                                | 3.44                                | 0.005                        |
| 102698_at                                   | Epas1              | endothelial PAS domain protein 1                            | 1.73                                | 0.005                        |
| <b>metabolism / enzyme</b>                  |                    |                                                             |                                     |                              |
| 100016_at                                   | Mmp11              | matrix metalloproteinase 11                                 | 2.29                                | 0.014                        |
| <b>transport protein</b>                    |                    |                                                             |                                     |                              |
| 94758_s_at                                  | Cftr               | cystic fibrosis transmembrane conductance regulator homolog | 2.14                                | 0.001                        |
| 101625_at                                   | Kcns2              | K <sup>+</sup> voltage-gated channel, subfamily S, 2        | 1.82                                | 0.016                        |
| 100982_at                                   | Kctd9              | potassium channel tetramerisation domain containing 9       | 1.51                                | 0.017                        |
| <b>secreted protein</b>                     |                    |                                                             |                                     |                              |
| 93956_at                                    | Ifit3              | interferon-induced protein with tetratricopeptide repeats 3 | 5.06                                | 0.026                        |
| 104447_r_at                                 | 4933428G09Rik      | RIKEN cDNA 4933428G09 gene                                  | 1.60                                | 0.011                        |

(a) Geometric mean ratio of gene expression levels in DC from CF mice vs. WT mice; n = 6 per-group.

(b) P value based on comparison of gene expression levels in DC of CF mice with WT mice.
