# Supplementary material for: Influence of the cystic fibrosis transmembrane conductance regulator on expression of lipid metabolism-related genes in dendritic cells
Source: PubMed Central journal article supplement (PMC2683168; doi:10.1186/1465-9921-10-26), 2009-04-03
Supplement: 1465-9921-10-26-S2.pdf [file 1465-9921-10-26-S2.pdf]

**Table 2. Down-regulated Genes in DC from CF Mice Compared to WT Mice**

| Category / Probe Set ID                     | Gene Symbol         | Gene Title                                                  | CF-Co / WT-Co <sup>(a)</sup> | p value <sup>(b)</sup> |
|---------------------------------------------|---------------------|-------------------------------------------------------------|------------------------------|------------------------|
| <b>signal transduction / growth control</b> |                     |                                                             |                              |                        |
| 160280_at                                   | Cav1                | caveolin, caveolae protein 1                                | -4.14                        | 0.006                  |
| 97549_at                                    | Cfl2                | cofilin 2, muscle                                           | -1.55                        | 0.010                  |
| 95546_g_at                                  | Igf1                | insulin-like growth factor 1                                | -1.51                        | 0.047                  |
| <b>metabolism / enzyme</b>                  |                     |                                                             |                              |                        |
| 93235_at                                    | BB128963            | expressed sequence BB128963                                 | -1.92                        | 0.007                  |
| 93299_at                                    | Msh6 /<br>LOC633695 | mutS homolog 6 (E. coli) similar to mutS homolog 6          | -1.82                        | 0.048                  |
| 92978_s_at                                  | Serpib2             | serine (or cysteine) peptidase inhibitor, clade B, member 2 | -1.75                        | 0.034                  |
| 97227_at                                    | Gna12               | guanine nucleotide binding protein, alpha 12                | -1.60                        | 0.049                  |

(a) Geometric mean ratio of gene expression levels in DC from CF mice vs. WT mice; n = 6 per-group.

(b) P value based on comparison of gene expression levels in DC of CF mice with WT mice.
