# Supplementary material for: Influence of the cystic fibrosis transmembrane conductance regulator on expression of lipid metabolism-related genes in dendritic cells
Source: PubMed Central journal article supplement (PMC2683168; doi:10.1186/1465-9921-10-26), 2009-04-03
Supplement: 1465-9921-10-26-S3.pdf [file 1465-9921-10-26-S3.pdf]

**Table 3. Up-regulated Lipid Metabolism-related Genes in DC from WT and/or CF Mice following *P.aeruginosa* Infection**

| Probe Set ID | Gene Symbol | Gene Title                                                                    | n-fold up-regulation <sup>(a)</sup> |                        |             |                        |
|--------------|-------------|-------------------------------------------------------------------------------|-------------------------------------|------------------------|-------------|------------------------|
|              |             |                                                                               | PAK / Co WT                         | p value <sup>(b)</sup> | PAK / Co CF | p value <sup>(b)</sup> |
| 104647_at    | Ptgs2       | prostaglandin-endoperoxide synthase 2                                         | 131.93                              | 0.000                  | 118.30      | 0.005                  |
| 104406_at    | Ptges       | prostaglandin E synthase                                                      | 7.58                                | 0.000                  | 8.96        | 0.013                  |
| 94214_at     | Fabp3       | fatty acid binding protein 3, muscle and heart                                | 6.91                                | 0.016                  | 5.37        | 0.057                  |
| 96662_at     | Ppap2b      | phosphatidic acid phosphatase type 2B                                         | 5.85                                | 0.003                  | 4.78        | 0.060                  |
| 104509_at    | Ch25h       | cholesterol 25-hydroxylase                                                    | 5.54                                | 0.008                  | 4.34        | 0.087                  |
| 94507_at     | Acs11       | acyl-CoA synthetase long-chain family member 1                                | 3.48                                | 0.000                  | 3.37        | 0.030                  |
| 160280_at    | Cav1        | caveolin, caveolae protein 1                                                  | 3.28                                | 0.017                  | 2.61        | 0.384                  |
| 99592_f_at   | Rdh11       | retinol dehydrogenase 11                                                      | 2.66                                | 0.001                  | 2.07        | 0.038                  |
| 160171_f_at  | Acot9       | acyl-CoA thioesterase 9                                                       | 1.75                                | 0.017                  | 1.32        | 0.379                  |
| 104017_at    | Acs14       | acyl-CoA synthetase long-chain family member 4                                | 1.73                                | 0.027                  | 1.62        | 0.168                  |
| 99513_at     | Pla2g4a     | phospholipase A2, group IVA (cytosolic, calcium-dependent)                    | 1.70                                | 0.011                  | 1.39        | 0.466                  |
| 102370_at    | Hsd17b11    | hydroxysteroid (17-beta) dehydrogenase 11                                     | 1.64                                | 0.006                  | 1.40        | 0.030                  |
| 102659_at    | Cln3        | ceroid lipofuscinosis, neuronal 3, juvenile (Batten, Spielmeyer-Vogt disease) | 1.62                                | 0.021                  | 1.63        | 0.195                  |

(a) Geometric mean ratio of gene expression levels of *P. aeruginosa* infected DC samples/uninfected DC samples; n = 6 per condition

(b) P value based on comparison of *P. aeruginosa* infected DC with uninfected controls
