# Supplementary material for: Influence of the cystic fibrosis transmembrane conductance regulator on expression of lipid metabolism-related genes in dendritic cells
Source: PubMed Central journal article supplement (PMC2683168; doi:10.1186/1465-9921-10-26), 2009-04-03
Supplement: 1465-9921-10-26-S4.pdf [file 1465-9921-10-26-S4.pdf]

**Table 4. Down-regulated Lipid Metabolism-related Genes in DC from WT and/or CF Mice following *P.aeruginosa* Infection**

| Probe<br>Set ID | Gene<br>Symbol | Gene Title                                               | n-fold up-regulation <sup>(a)</sup> |                        |             |                        |
|-----------------|----------------|----------------------------------------------------------|-------------------------------------|------------------------|-------------|------------------------|
|                 |                |                                                          | PAK / Co WT                         | p value <sup>(b)</sup> | PAK / Co CF | p value <sup>(b)</sup> |
| 98989_at        | Dhcr7          | 7-dehydrocholesterol reductase                           | -7.19                               | 0.019                  | -3.20       | 0.080                  |
| 95758_at        | Scd2           | stearoyl-Coenzyme A desaturase 2                         | -5.58                               | 0.001                  | -3.04       | 0.168                  |
| 95597_at        | Ptgs1          | prostaglandin-endoperoxide synthase 1                    | -4.93                               | 0.006                  | -2.95       | 0.082                  |
| 93320_at        | Cpt1a          | carnitine palmitoyltransferase 1a, liver                 | -3.48                               | 0.007                  | -2.63       | 0.072                  |
| 101426_at       | Cerk           | ceramide kinase                                          | -2.51                               | 0.000                  | -2.21       | 0.163                  |
| 103299_at       | Pld4           | phospholipase D family, member 4                         | -2.40                               | 0.002                  | -2.20       | 0.195                  |
| 100066_at       | Gart           | phosphoribosylglycinamide formyltransferase              | -2.05                               | 0.006                  | -1.75       | 0.146                  |
| 94056_at        | Scd1           | stearoyl-Coenzyme A desaturase 1                         | -1.94                               | 0.024                  | -1.53       | 0.250                  |
| 92474_at        | Pld1           | phospholipase D1                                         | -1.93                               | 0.029                  | -1.71       | 0.609                  |
| 104003_at       | Phka2          | phosphorylase kinase alpha 2                             | -1.82                               | 0.009                  | -2.11       | 0.201                  |
| 100099_at       | Smpd1          | sphingomyelin phosphodiesterase 1, acid lysosomal        | -1.75                               | 0.025                  | -1.68       | 0.219                  |
| 103401_at       | Acads          | acyl-Coenzyme A dehydrogenase, short chain               | -1.74                               | 0.014                  | -1.32       | 0.453                  |
| 160770_at       | Mvd            | mevalonate (diphospho) decarboxylase                     | -1.67                               | 0.007                  | -1.47       | 0.256                  |
| 98909_at        | Lias           | lipoic acid synthetase                                   | -1.66                               | 0.036                  | -1.44       | 0.301                  |
| 94872_at        | Smpd13a        | sphingomyelin phosphodiesterase, acid-like 3A            | -1.66                               | 0.031                  | -1.51       | 0.353                  |
| 161074_at       | Pcyt1a         | phosphate cytidylyltransferase 1, choline, alpha isoform | -1.55                               | 0.045                  | -1.57       | 0.207                  |
| 97515_at        | Hsd17b4        | hydroxysteroid (17-beta) dehydrogenase 4                 | -1.50                               | 0.040                  | -1.50       | 0.369                  |

(a) Geometric mean ratio of gene expression levels of *P. aeruginosa* infected DC samples/uninfected DC samples; n = 6 per condition

(b) P value based on comparison of *P. aeruginosa* infected DC with uninfected controls
